# Supplementary material for: SCD5 Regulation by VHL Affects Cell Proliferation and Lipid Homeostasis in ccRCC
Source: MDPI journal article supplement (doi:10.3390/cells12060835), 2023-03-08

Supplementary Figure S1

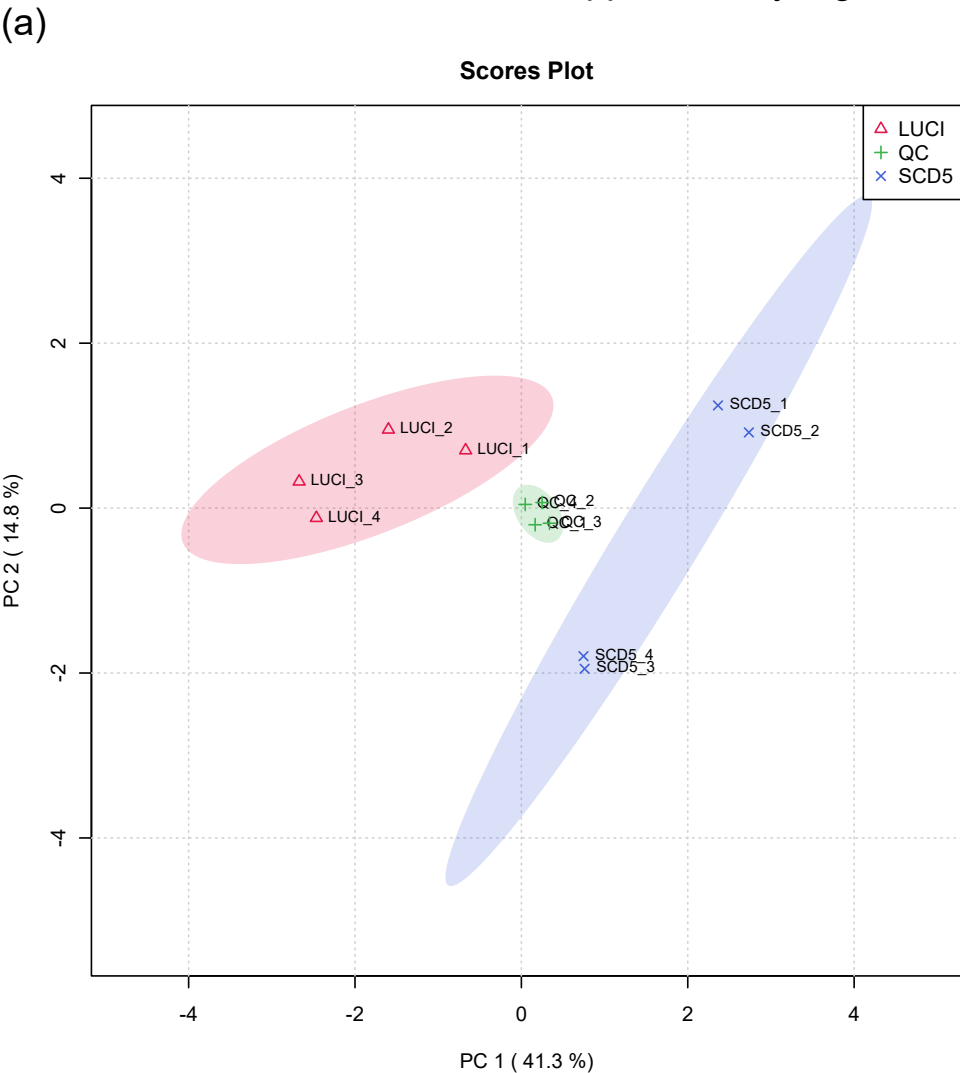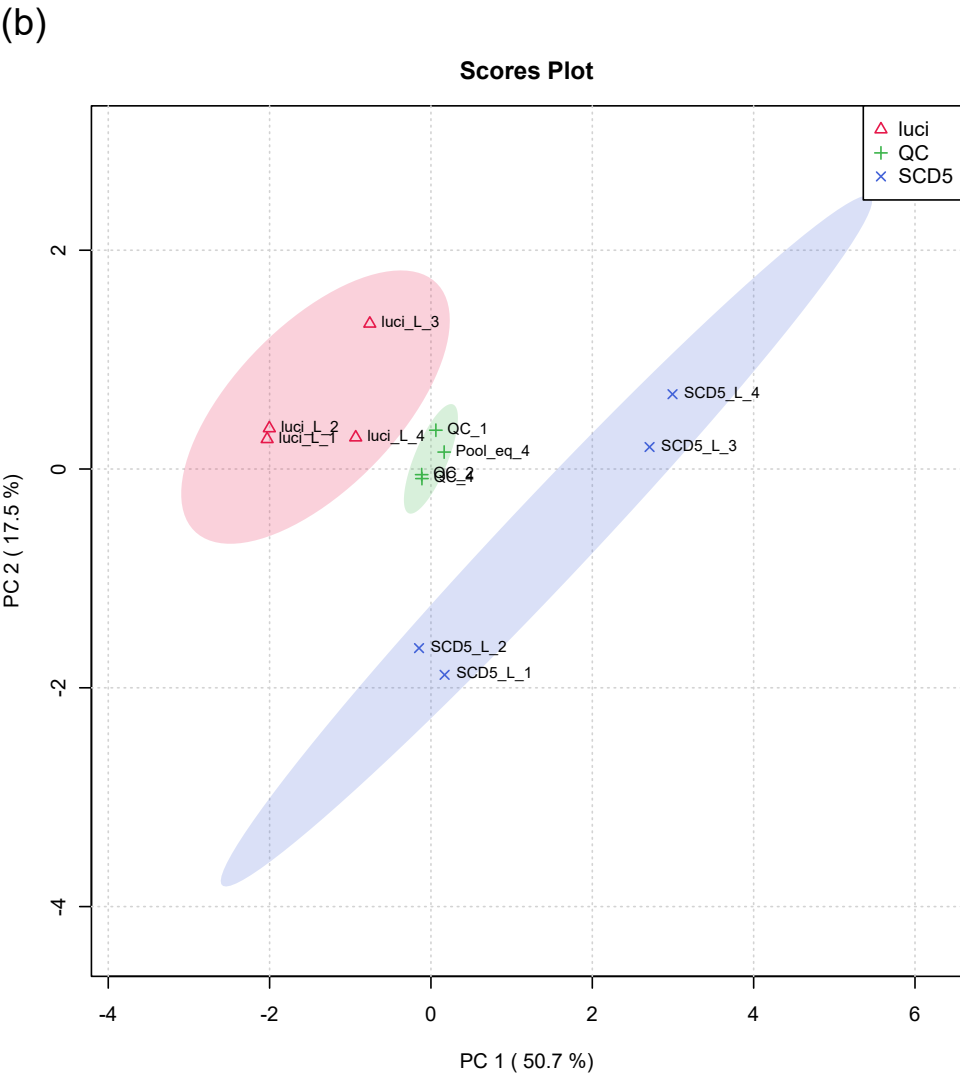

Supplementary Figure S2: Uncropped Western blots including replicates for quantitative analyses

Figure 1d

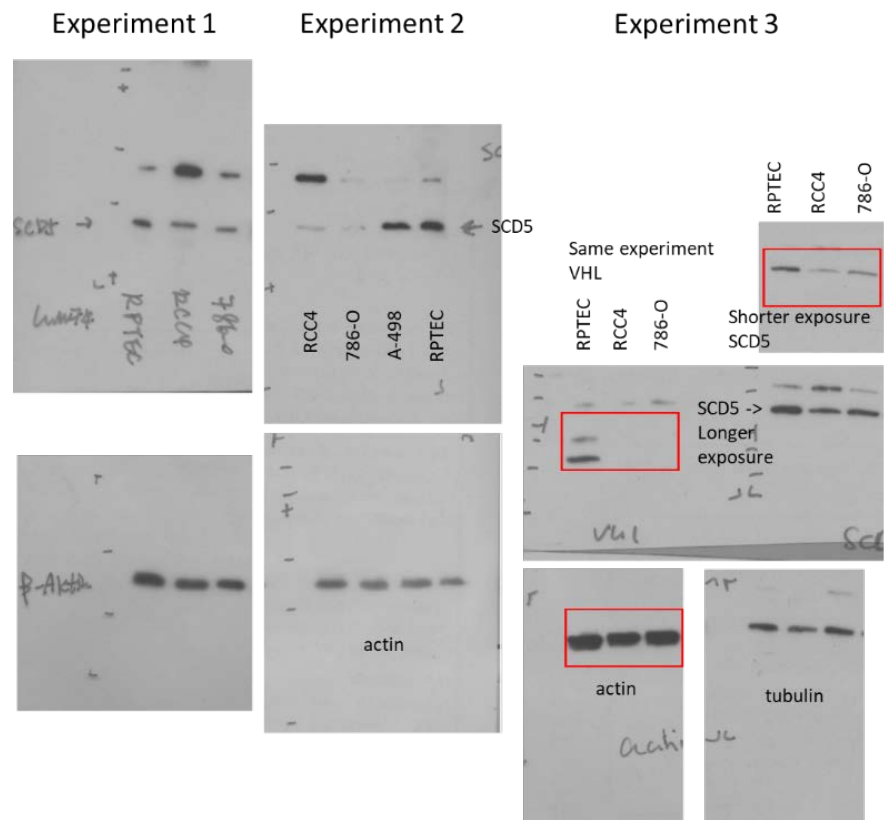

Figure 2b

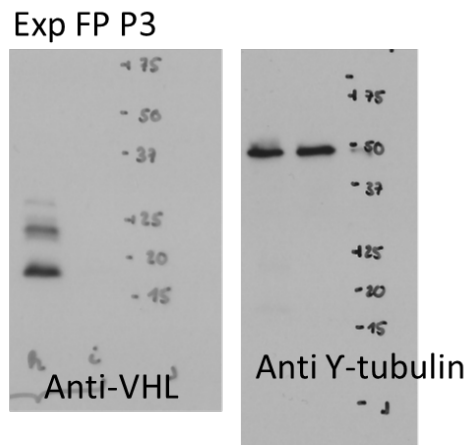

Figure 2e

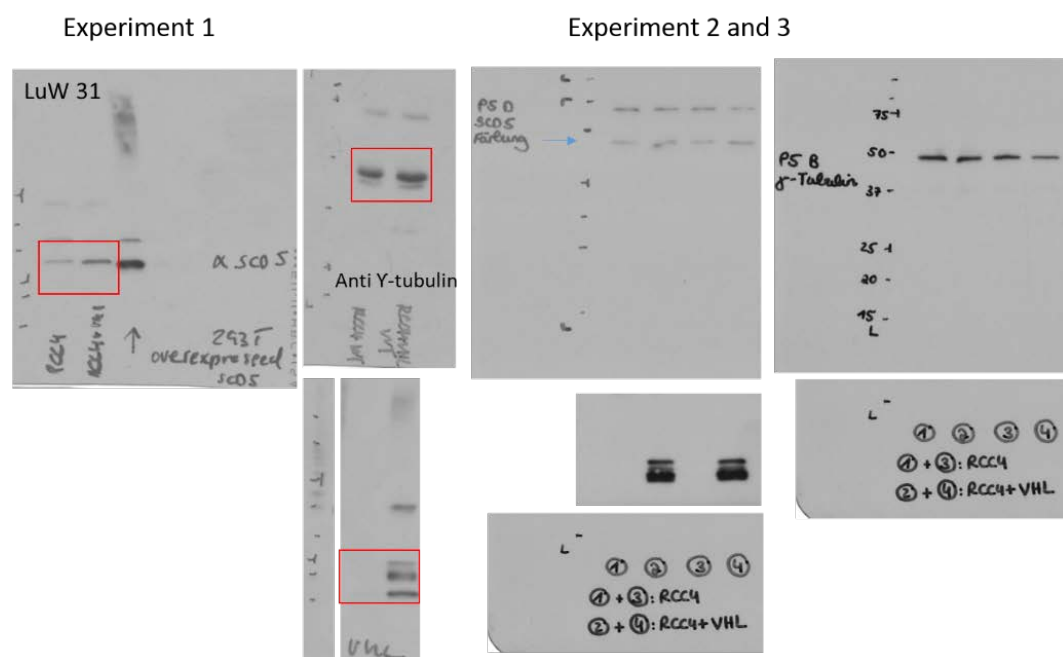

Figure 4b

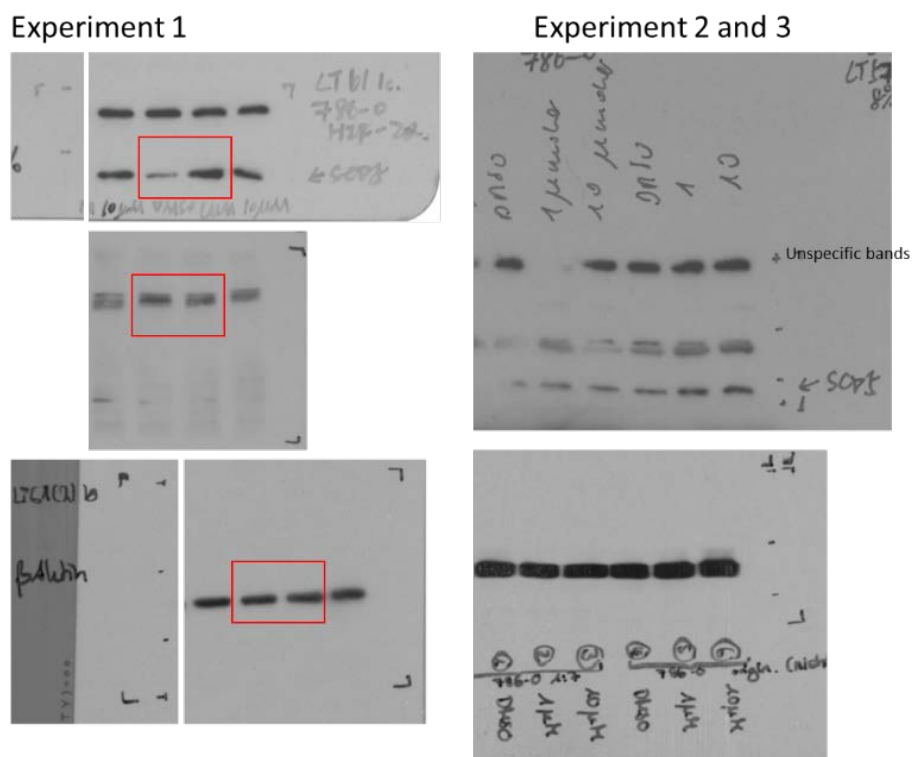

Figure 4c

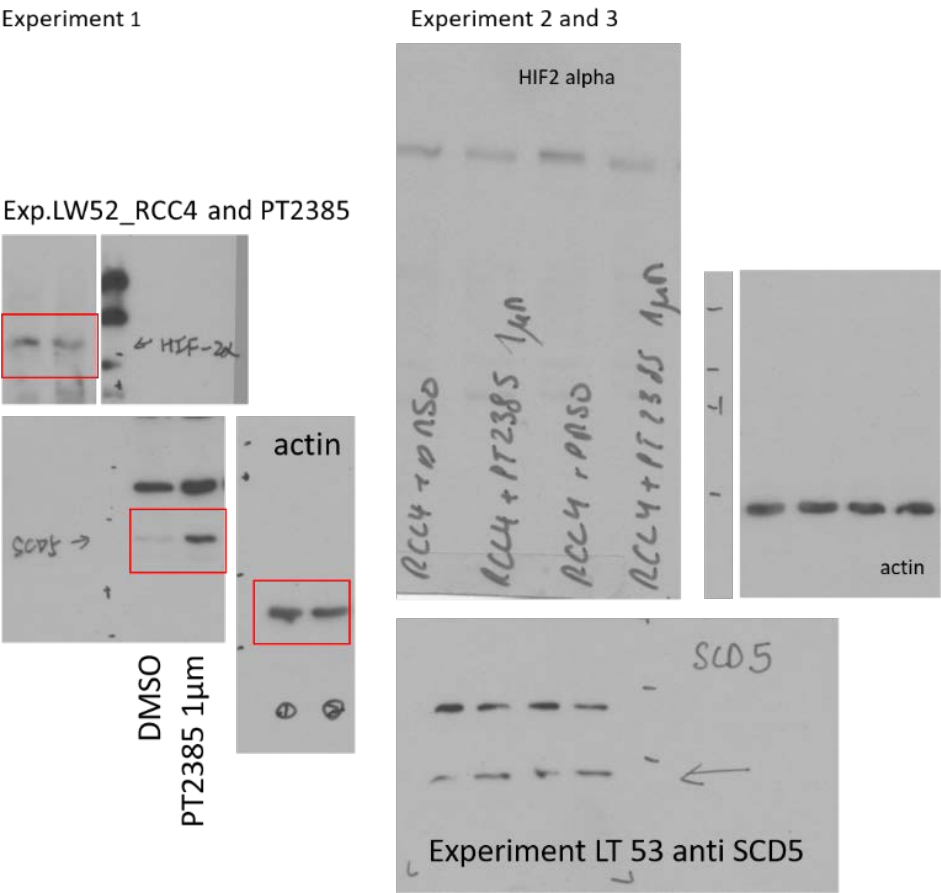

Figure 4d

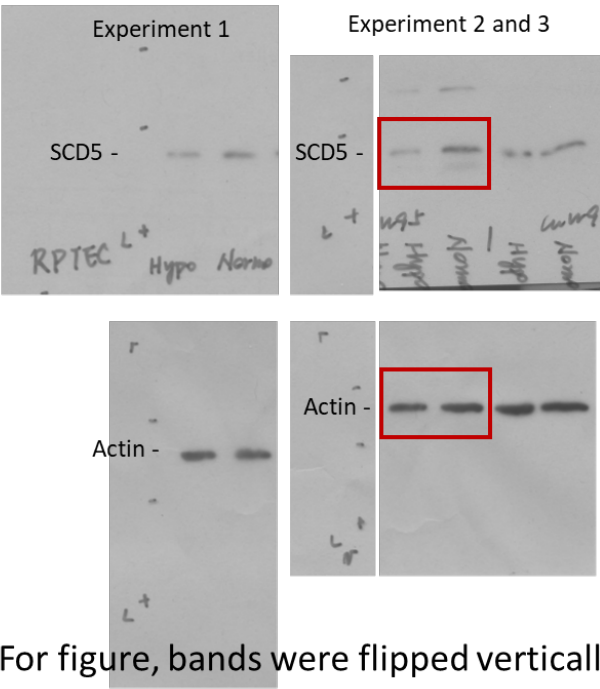

Figure 5b and Figure 5d

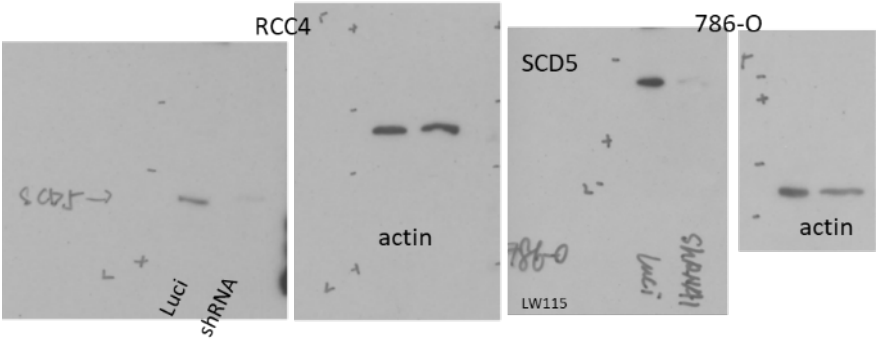

Supplement: s1 [file s1]
